# Supplementary material for: A dodecanuclear metallamacrocycle having a multidentate bridging ligand in two different binding modes
Source: Royal Society of Chemistry journal article supplement (doi:10.1039/b810711d), 2008-01-01
Supplement: b810711d.pdf [file b810711d.pdf]

## Supporting Information

### **A Dodecanuclear Metallamacrocyclic Having a Multidentate Bridging Ligand with Two Different Binding Modes**

Xinfang Liu,<sup>a</sup> Wenlong Liu,<sup>a,b</sup> Kyungjin Lee,<sup>a</sup> Mira Park,<sup>a</sup> Hyeong-Cheol Ri,<sup>c</sup> Ghyung Hwa Kim,<sup>d</sup> and Myoung Soo Lah\*<sup>a</sup>

<sup>a</sup> Department of Chemistry and Applied Chemistry, College of Science and Technology, Hanyang University, Ansan, Kyunggi-Do 426-791, Korea. Fax: 82 31 436 8100; Tel: 82 31 400 5496; E-mail: mslah@hanyang.ac.kr

<sup>b</sup> Visiting scholar from Yangzhou University, China.

<sup>c</sup> Department of Physics, Kyungpook National University, Daegu, 702-701 Korea.

<sup>d</sup> Pohang Accelerator Laboratory, Pohang, Kyungbook, 790-784 Korea.

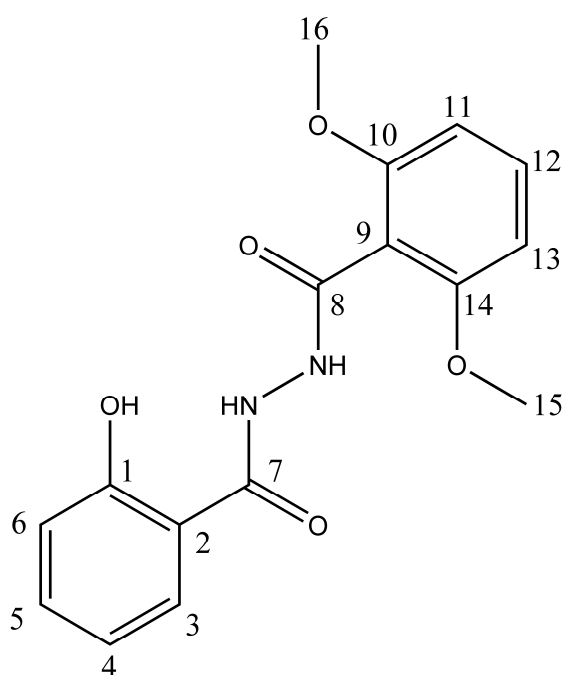

**Scheme S1.** A numbering scheme of the ligand, H<sub>3</sub>dmbshz.

Table S1. Crystal data and structure refinement for complex **1**.

|                                   |                                                                                    |           |
|-----------------------------------|------------------------------------------------------------------------------------|-----------|
| Empirical formula                 | C <sub>230</sub> H <sub>294</sub> Mn <sub>12</sub> N <sub>24</sub> O <sub>82</sub> |           |
| Formula weight                    | 5366.17                                                                            |           |
| Temperature                       | 100(2) K                                                                           |           |
| Wavelength                        | 0.70000 Å                                                                          |           |
| Crystal system                    | Rhombohedral                                                                       |           |
| Space group                       | R-3                                                                                |           |
| Unit cell dimensions              | a = 29.040(4) Å                                                                    | α = 90°.  |
|                                   | b = 29.040(4) Å                                                                    | β = 90°.  |
|                                   | c = 26.733(5) Å                                                                    | γ = 120°. |
| Volume                            | 19524(5) Å <sup>3</sup>                                                            |           |
| Z                                 | 3                                                                                  |           |
| Density (calculated)              | 1.369 Mg/m <sup>3</sup>                                                            |           |
| Absorption coefficient            | 0.648 mm <sup>-1</sup>                                                             |           |
| F(000)                            | 8394                                                                               |           |
| Crystal size                      | 0.06 x 0.04 x 0.04 mm <sup>3</sup>                                                 |           |
| Theta range for data collection   | 1.09 to 26.57°.                                                                    |           |
| Index ranges                      | -37 ≤ h ≤ 23, -37 ≤ k ≤ 37, -34 ≤ l ≤ 29                                           |           |
| Reflections collected             | 25353                                                                              |           |
| Independent reflections           | 9406 [R(int) = 0.0711]                                                             |           |
| Completeness to theta = 26.57°    | 99.0 %                                                                             |           |
| Absorption correction             | Empirical                                                                          |           |
| Max. and min. transmission        | 0.9745 and 0.9621                                                                  |           |
| Refinement method                 | Full-matrix least-squares on F <sup>2</sup>                                        |           |
| Data / restraints / parameters    | 9406 / 1 / 462                                                                     |           |
| Goodness-of-fit on F <sup>2</sup> | 0.890                                                                              |           |
| Final R indices [I > 2σ(I)]       | R1 = 0.0656, wR2 = 0.1896                                                          |           |
| R indices (all data)              | R1 = 0.1299, wR2 = 0.2123                                                          |           |
| Largest diff. peak and hole       | 0.535 and -0.454 e.Å <sup>-3</sup>                                                 |           |

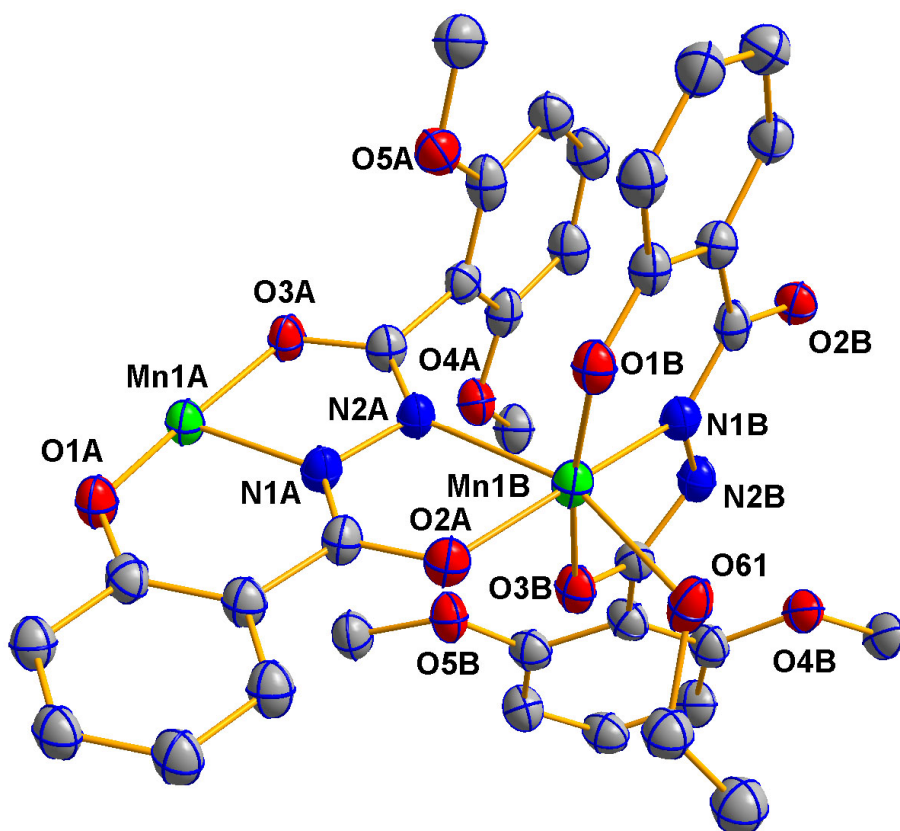

**Figure S1.** An ORTEP diagram of the asymmetric unit of **1** drawn with 20% probability ellipsoids.

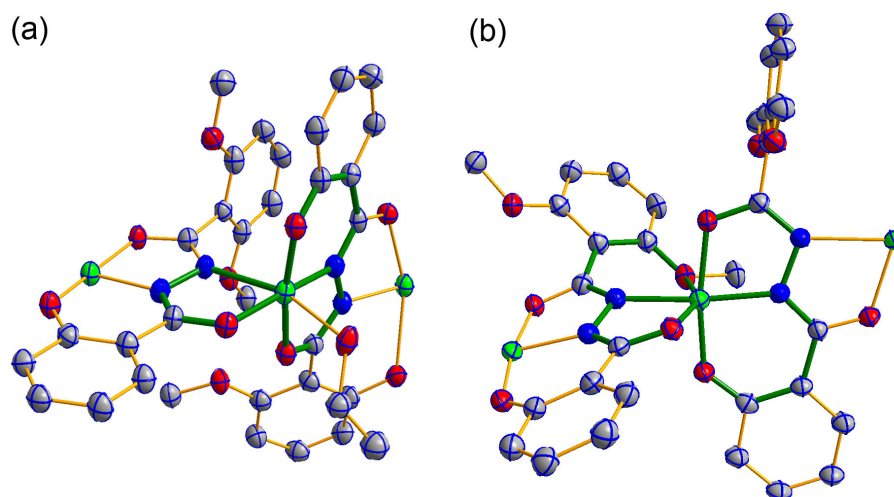

**Figure S2.** The two different types of chelation modes observed around the metal centers. (a) A bidentate-tridentate chelation mode leads to a  $\Lambda/\Delta$ -type chiral configuration. (b) A tridentate-tridentate chelation mode leads to a  $C/A$ -type chiral configuration.

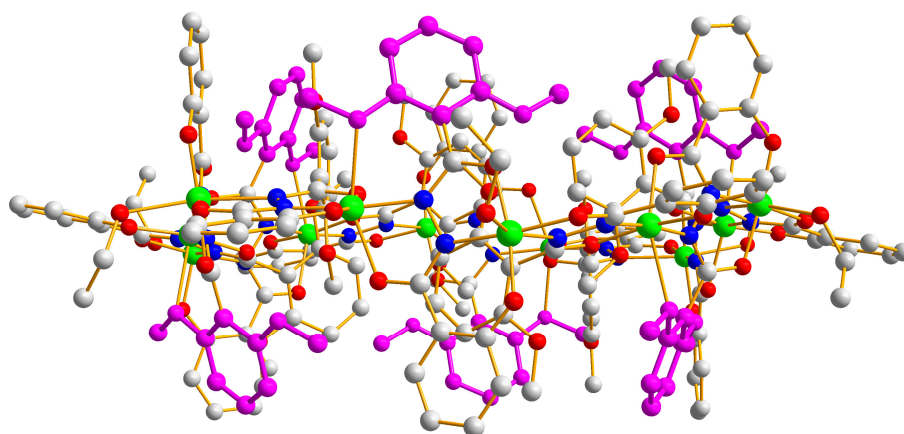

**Figure S3.** A ball-and-stick side view of 1. Six 2,6-dimethoxyphenyl groups involved in the ligation to the ring metal centers are arranged vertically up and down relative to the metalladiazamacrocyclic ring plane.

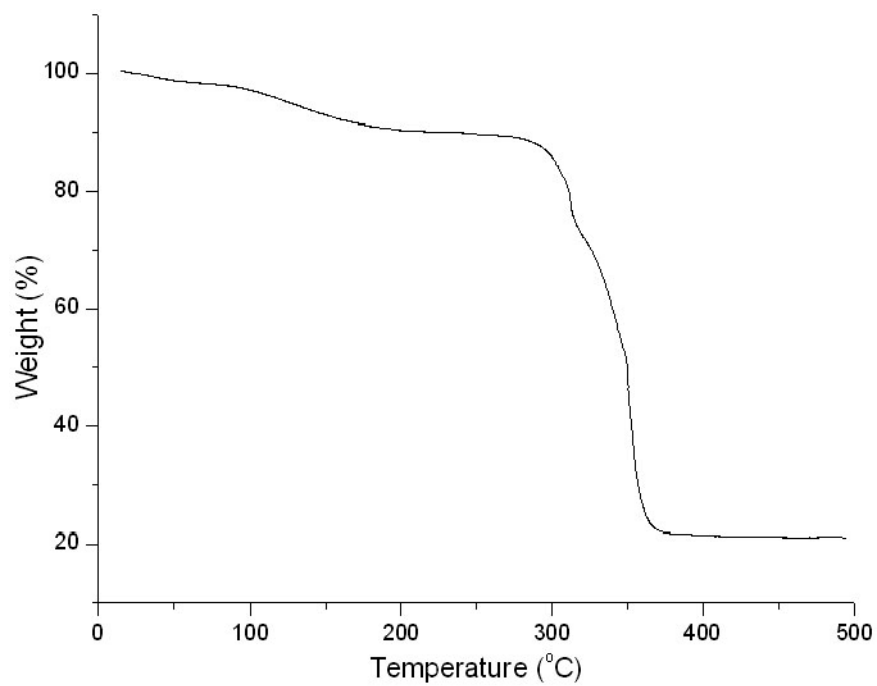

**Figure S4.** TGA of the dodecanuclear metalladiazamacrocycle, **1**.
